# Supplementary material for: Technical and Clinical Outcome of Low-Milliampere CT Fluoroscopy-Guided Percutaneous Drainage Placement in Abdominal Fluid Collections after Liver Transplantation: A 16-Year Retrospective Analysis of 50 Consecutive Patients
Source: MDPI journal article supplement (doi:10.3390/diagnostics14040353), 2024-02-06
Supplement: s1 [file s1]

**Supplementary Table S1:** Parameters of the generalized linear mixed models (GLMM) used in Supplementary Figure S1.

| <i>Predictors</i>                                       | <b>Albumin</b>   |                   |                  | <b>Cholinesterase</b> |                   |                  | <b>ALT</b>       |                   |                  |
|---------------------------------------------------------|------------------|-------------------|------------------|-----------------------|-------------------|------------------|------------------|-------------------|------------------|
|                                                         | <i>Estimates</i> | <i>CI</i>         | <i>p</i>         | <i>Estimates</i>      | <i>CI</i>         | <i>p</i>         | <i>Estimates</i> | <i>CI</i>         | <i>p</i>         |
| (Intercept)                                             | 0.44             | 0.39 – 0.49       | <b>&lt;0.001</b> | 0.41                  | 0.33 – 0.48       | <b>&lt;0.001</b> | 1.44             | 1.28 – 1.60       | <b>&lt;0.001</b> |
| Time (days)                                             | 0.00             | 0.00 – 0.00       | <b>&lt;0.001</b> | 0.01                  | 0.00 – 0.01       | <b>&lt;0.001</b> | -0.01            | -0.01 – -0.00     | <b>&lt;0.001</b> |
| <b>Random Effects:</b>                                  |                  |                   |                  |                       |                   |                  |                  |                   |                  |
| $\sigma^2$                                              |                  | 0.00              |                  |                       | 0.00              |                  |                  | 0.05              |                  |
| $\tau_{00}$                                             |                  | 0.01 Procedure ID |                  |                       | 0.03 Procedure ID |                  |                  | 0.15 Procedure ID |                  |
| ICC                                                     |                  | 0.81              |                  |                       | 0.86              |                  |                  | 0.77              |                  |
| N                                                       |                  | 19 Procedure ID   |                  |                       | 24 Procedure ID   |                  |                  | 25 Procedure ID   |                  |
| Observations                                            |                  | 93                |                  |                       | 167               |                  |                  | 364               |                  |
| Marginal R <sup>2</sup> /<br>Conditional R <sup>2</sup> |                  | 0.051 / 0.823     |                  |                       | 0.055 / 0.870     |                  |                  | 0.017 / 0.776     |                  |

CI: Confidence Interval; R<sup>2</sup>: Coefficient of Determination;  $\sigma^2$ : distribution-specific variance;  $\tau_{00}$ : between-subject-variance; ICC: intra-class correlation coefficient, N: number of subjects. P-values in bold indicate significant effects. ALT: Alanine-Aminotransferase.

**Supplementary Table S2:** Parameters of the generalized linear mixed models (GLMM) used for time course of parameters for liver function.

| <i>Predictors</i>          | <b>Bilirubin</b> |                   |          | <b>INR</b>       |                   |                  |
|----------------------------|------------------|-------------------|----------|------------------|-------------------|------------------|
|                            | <i>Estimates</i> | <i>CI</i>         | <i>p</i> | <i>Estimates</i> | <i>CI</i>         | <i>p</i>         |
| (Intercept)                | 0.11             | -0.03 – 0.24      | 0.118    | 1.15             | 1.11 – 1.20       | <b>&lt;0.001</b> |
| Time (days)                | -0.00            | -0.00 – 0.00      | 0.085    | -0.00            | -0.00 – -0.00     | 0.068            |
| <b>Random Effects:</b>     |                  |                   |          |                  |                   |                  |
| $\sigma^2$                 |                  | 0.03              |          |                  | 0.01              |                  |
| $\tau_{00}$                |                  | 0.11 Procedure ID |          |                  | 0.01 Procedure ID |                  |
| ICC                        |                  | 0.79              |          |                  | 0.63              |                  |
| N                          |                  | 25 Procedure ID   |          |                  | 22 Procedure ID   |                  |
| Observations               |                  | 365               |          |                  | 282               |                  |
| Marginal R <sup>2</sup> /  |                  | 0.002 / 0.795     |          |                  | 0.006 / 0.636     |                  |
| Conditional R <sup>2</sup> |                  |                   |          |                  |                   |                  |

CI: Confidence Interval; R<sup>2</sup>: Coefficient of Determination;  $\sigma^2$ : distribution-specific variance;  $\tau_{00}$ : between-subject-variance; ICC: intraclass correlation coefficient, N: number of subjects. P-values in bold indicate significant effects. INR: International Normalized Ratio.

**Supplementary Table S3:** Parameters of the generalized linear mixed models (GLMM) used for time course of parameters for liver damage.

| <i>Predictors</i>          | <b>GGT</b>       |                   |                  | <b>AST</b>       |                   |                  | <b>Antithrombin</b> |                   |                  |
|----------------------------|------------------|-------------------|------------------|------------------|-------------------|------------------|---------------------|-------------------|------------------|
|                            | <i>Estimates</i> | <i>CI</i>         | <i>p</i>         | <i>Estimates</i> | <i>CI</i>         | <i>p</i>         | <i>Estimates</i>    | <i>CI</i>         | <i>p</i>         |
| (Intercept)                | 2.10             | 1.94 – 2.25       | <b>&lt;0.001</b> | 1.46             | 1.38 – 1.54       | <b>&lt;0.001</b> | 1.90                | 1.78 – 2.02       | <b>&lt;0.001</b> |
| Time (days)                | 0.00             | 0.00 – 0.01       | 0.091            | -0.00            | -0.00 – 0.00      | 0.158            | -0.00               | -0.01 – 0.01      | 0.962            |
| <b>Random Effects:</b>     |                  |                   |                  |                  |                   |                  |                     |                   |                  |
| $\sigma^2$                 |                  | 0.03              |                  |                  | 0.03              |                  |                     | 0.00              |                  |
| $\tau_{00}$                |                  | 0.14 Procedure ID |                  |                  | 0.03 Procedure ID |                  |                     | 0.02 Procedure ID |                  |
| ICC                        |                  | 0.82              |                  |                  | 0.57              |                  |                     | 0.81              |                  |
| N                          |                  | 25 Procedure ID   |                  |                  | 24 Procedure ID   |                  |                     | 7 Procedure ID    |                  |
| Observations               |                  | 358               |                  |                  | 278               |                  |                     | 21                |                  |
| Marginal R <sup>2</sup> /  |                  | 0.005 / 0.820     |                  |                  | 0.004 / 0.567     |                  |                     | 0.000 / 0.809     |                  |
| Conditional R <sup>2</sup> |                  |                   |                  |                  |                   |                  |                     |                   |                  |

CI: Confidence Interval; R<sup>2</sup>: Coefficient of Determination;  $\sigma^2$ : distribution-specific variance;  $\tau_{00}$ : between-subject-variance; ICC: intraclass correlation coefficient, N: number of subjects. P-values in bold indicate significant effects. GGT: Gamma glutamyltransferase; AST: Aspartate Aminotransferase

**Supplementary Table S4:** Visual appearance of the drainage fluid depending on the infection status.

| Visual appearance <sup>1</sup> |                   | Proof of germs <sup>2</sup> |            |
|--------------------------------|-------------------|-----------------------------|------------|
|                                |                   | Positive                    | Negative   |
| Bloody                         | 8 (12.3%)         | 4 (50.0%)                   | 4 (50.0%)  |
| Chylus                         | <b>1 (1.5%)</b>   | 1 (100.0%)                  | 0 (0.0%)   |
| Purulent                       | <b>15 (23.1%)</b> | <b>14 (93.3%)</b>           | 1 (6.7 %)  |
| Bilious                        | 24 (36.9%)        | 13 (54.2 %)                 | 11 (45.8%) |
| Serous                         | 17 (26.2%)        | 9 (52.9 %)                  | 8 (47.1 %) |

<sup>1</sup>: Numbers (Percentage). The group includes all cases where the visual appearance of the drainage fluid was documented (n=65). Percentages refer to the column values. <sup>2</sup>: Numbers (Percentage). Subgroup in which germ detection was performed. Percentages refer to the row values. Values in bold indicates significant result in Chi<sup>2</sup>-test.

**Supplementary Table S5:** Factors affecting clinical success. Parameters refer to the level of each intervention session.

| Parameter                                                                          | Value / Unit                          | Clinical Success Group                |    |                                       |    | P-value<br>(Intergroup<br>comparison) | P-value<br>(Pairwise post-<br>hoc comparison) <sup>1)</sup> |
|------------------------------------------------------------------------------------|---------------------------------------|---------------------------------------|----|---------------------------------------|----|---------------------------------------|-------------------------------------------------------------|
|                                                                                    |                                       | Successful                            | n  | Unsuccessful                          | n  |                                       |                                                             |
| Age                                                                                |                                       |                                       |    |                                       |    |                                       |                                                             |
|                                                                                    | Years                                 | 50.6 ± 10.43<br>(29-67) <sup>2)</sup> | 53 | 48.3 ± 11.27<br>(26-41) <sup>2)</sup> | 13 | 0.645                                 |                                                             |
| Gender                                                                             |                                       |                                       |    |                                       |    |                                       |                                                             |
|                                                                                    | Males                                 | 42 (75.0%) <sup>3)</sup>              | 56 | 11 (84.6%) <sup>3)</sup>              | 13 | 0.717                                 |                                                             |
|                                                                                    | Females                               | 14 (25.0%) <sup>3)</sup>              |    | 2 (15.4%) <sup>3)</sup>               |    |                                       |                                                             |
| Indication for liver<br>transplantation                                            |                                       |                                       |    |                                       |    |                                       |                                                             |
|                                                                                    | Ethyltoxic                            | 18 (32.1%) <sup>3)</sup>              | 56 | 1 (7.7%) <sup>3)</sup>                | 13 | <b>0.016</b>                          | <b>&lt;0.0001</b>                                           |
|                                                                                    | Ethyltoxic + HCC                      | 6 (10.7%) <sup>3)</sup>               |    | 0 (0.0%) <sup>3)</sup>                |    |                                       | <b>0.009</b>                                                |
|                                                                                    | Other <sup>*)</sup>                   | 32 (57.2%) <sup>3)</sup>              |    | 12 (92.3%) <sup>3)</sup>              |    |                                       | >0.999                                                      |
| Transplantation<br>number                                                          |                                       |                                       |    |                                       |    |                                       |                                                             |
|                                                                                    | First transplantation                 | 50 (89.3%) <sup>3)</sup>              | 56 | 13 (100%) <sup>3)</sup>               | 13 | 0.586                                 |                                                             |
|                                                                                    | Retransplantation                     | 6 (10.7%) <sup>3)</sup>               |    | 0 (0.0%) <sup>3)</sup>                |    |                                       |                                                             |
| Backtable vascular<br>anastomosis<br>required during<br>transplantation<br>surgery |                                       |                                       |    |                                       |    |                                       |                                                             |
|                                                                                    | Accessory / aberant hepatic<br>artery | 13 (28.9%) <sup>3)</sup>              | 45 | 1 (12.5%) <sup>3)</sup>               | 8  | >0.999                                |                                                             |
|                                                                                    | none                                  | 32 (71.1%) <sup>3)</sup>              |    | 7 (87.5%) <sup>3)</sup>               |    |                                       |                                                             |
| Type of Biliary<br>anastomosis                                                     |                                       |                                       |    |                                       |    |                                       |                                                             |
|                                                                                    | End-to-end                            | 31 (75.6%) <sup>3)</sup>              | 41 | 6 (75.0%) <sup>3)</sup>               | 8  | 0.815                                 |                                                             |
|                                                                                    | End-to-side                           | 3 (7.3%) <sup>3)</sup>                |    | 0 (0.0%) <sup>3)</sup>                |    |                                       |                                                             |
|                                                                                    | Biliodigestive                        | 7 (17.1%) <sup>3)</sup>               |    | 2 (25.0%) <sup>3)</sup>               |    |                                       |                                                             |
| Type of donor<br>liver                                                             |                                       |                                       |    |                                       |    |                                       |                                                             |

|                                                     |                              |                                        |    |                                       |    |       |
|-----------------------------------------------------|------------------------------|----------------------------------------|----|---------------------------------------|----|-------|
|                                                     | Whole liver                  | 43 (84.3%) <sup>3)</sup>               | 51 | 10 (100.0%) <sup>3)</sup>             | 10 | 0.332 |
|                                                     | Split liver                  | 8 (15.7%) <sup>3)</sup>                |    | 0 (0.0%) <sup>3)</sup>                |    |       |
| Type of transplanation surgery                      | Piggyback                    | 27 (64.3%) <sup>3)</sup>               | 42 | 5 (50.0%) <sup>3)</sup>               | 10 | 0.532 |
|                                                     | Belghiti                     | 11 (26.2%) <sup>3)</sup>               |    | 3 (30.0%) <sup>3)</sup>               |    |       |
|                                                     | Vena cava resection          | 4 (9.5%) <sup>3)</sup>                 |    | 2 (20.0%) <sup>3)</sup>               |    |       |
| Additonal surgery procedures during transplantation | Performed                    | 3 (5.9%) <sup>3)</sup>                 | 51 | 2 (20.0%) <sup>3)</sup>               | 10 | 0.189 |
|                                                     | Not performed                | 48 (94.1%) <sup>3)</sup>               |    | 8 (80.0%) <sup>3)</sup>               |    |       |
| Intervall Transplantation surgery to Intervention   | Days                         | 108.5 [34, 327] (7-8351) <sup>4)</sup> | 56 | 162 [43, 687] (19-8315) <sup>4)</sup> | 13 | 0.519 |
| Applied Immunosupressiva                            | Tacrolimus                   | 35 (62.5%) <sup>3)</sup>               | 56 | 8 (61.5%) <sup>3)</sup>               | 13 | 0.768 |
|                                                     | Tacrolimus+Mycophenolate     | 5 (8.9%) <sup>3)</sup>                 |    | 1 (7.7%) <sup>3)</sup>                |    |       |
|                                                     | Cyclosporin A                | 7 (12.5%) <sup>3)</sup>                |    | 3 (23.1%) <sup>3)</sup>               |    |       |
|                                                     | Cyclosporin A+ Mycophenolate | 3 (5.4%) <sup>3)</sup>                 |    | 0 (0.0%) <sup>3)</sup>                |    |       |
|                                                     | Cyclosporin A+ Sirolimus     | 2 (3.6%) <sup>3)</sup>                 |    | 0 (0.0%) <sup>3)</sup>                |    |       |
|                                                     | Sirolimus                    | 4 (7.2%) <sup>3)</sup>                 |    | 1 (7.7%) <sup>3)</sup>                |    |       |
| Total number of fluid collections                   | 1                            | 38 (66.1%) <sup>3)</sup>               | 56 | 10 (76.9%) <sup>3)</sup>              | 13 |       |
|                                                     | 2                            | 16 (28.6%) <sup>3)</sup>               |    | 2 (15.4%) <sup>3)</sup>               |    |       |
|                                                     | 3                            | 2 (3.6%) <sup>3)</sup>                 |    | 1 (7.7%) <sup>3)</sup>                |    |       |
|                                                     | 4                            | 1 (1.8%) <sup>3)</sup>                 |    | 0 (0.0%) <sup>3)</sup>                |    |       |

N: number; <sup>1)</sup> only if applicable; <sup>2)</sup> Mean value ± standard deviation (range), <sup>3)</sup> Numbers (Percentage); <sup>4)</sup> median [25%-; 75%-quartiles] (range), HCC: Hepatocellular carcinoma

\*) For the sake of clarity, the remaining indications are not listed here. In these cases, no significant group differences were observed

p-Values in bold indicate significant differences

**Supplementary Table S6:** Factors affecting clinical success. Parameters refer to the level of the fluid collection.

| Parameter                         | Value / Unit                   | Clinical Success Group                  |    |                                           |    | P-value<br>(Intergroup comparison) | P-value<br>(Pairwise post-hoc<br>comparison) <sup>1)</sup> |
|-----------------------------------|--------------------------------|-----------------------------------------|----|-------------------------------------------|----|------------------------------------|------------------------------------------------------------|
|                                   |                                | Successful                              | n  | Unsuccessful                              | n  |                                    |                                                            |
| Contrast enhancement on prior CT  | Enhancement                    | 12 (25.0%) <sup>2)</sup>                | 48 | 6 (50.0%) <sup>2)</sup>                   | 12 | 0.156                              |                                                            |
|                                   | No Enhancement                 | 36 (75.0%) <sup>2)</sup>                |    | 6 (50.0%) <sup>2)</sup>                   |    |                                    |                                                            |
| Air entrapment on prior CT        | Entrapment                     | 16 (23.2%) <sup>2)</sup>                | 69 | 3 (18.8%) <sup>2)</sup>                   | 16 | >0.999                             |                                                            |
|                                   | No Entrapment                  | 53 (76.8%) <sup>2)</sup>                |    | 13 (81.2%) <sup>2)</sup>                  |    |                                    |                                                            |
| Max. diameter of fluid collection |                                | 7.25 [4.2, 10.6] (2-17.2) <sup>3)</sup> | 72 | 6.3 [5.25, 11.2] (2.7-14.1) <sup>3)</sup> | 16 | 0.871                              |                                                            |
| Location of fluid collection      | Intrahepatic right liver lobe  | 32 (44.4%) <sup>2)</sup>                | 72 | 7 (43.8%) <sup>2)</sup>                   | 16 | 0.527                              |                                                            |
|                                   | Intrahepatic left liver lobe   | 11 (15.3%) <sup>2)</sup>                |    | 2 (12.5%) <sup>2)</sup>                   |    |                                    |                                                            |
|                                   | Intrahepatic central           | 3 (4.2%) <sup>2)</sup>                  |    | 0 (0.0%) <sup>2)</sup>                    |    |                                    |                                                            |
|                                   | Centrally congested bile ducts | 2 (2.8%) <sup>2)</sup>                  |    | 0 (0.0%) <sup>2)</sup>                    |    |                                    |                                                            |
|                                   | Prehepatic                     | 5 (6.9%) <sup>2)</sup>                  |    | 1 (6.3%) <sup>2)</sup>                    |    |                                    |                                                            |
|                                   | Subhepatic                     | 8 (11.1%) <sup>2)</sup>                 |    | 3 (18.8%) <sup>2)</sup>                   |    |                                    |                                                            |
|                                   | Perihepatic medial             | 5 (6.9%) <sup>2)</sup>                  |    | 0 (0.0%) <sup>2)</sup>                    |    |                                    |                                                            |
|                                   | Perihepatic lateral            | 4 (5.6%) <sup>2)</sup>                  |    | 1 (6.3%) <sup>2)</sup>                    |    |                                    |                                                            |
|                                   | Retrohepatic right             | 0 (0.0%) <sup>2)</sup>                  |    | 2 (12.5%) <sup>2)</sup>                   |    |                                    |                                                            |
|                                   | Retrohepatic left              | 1 (1.4%) <sup>2)</sup>                  |    | 0 (0.0%) <sup>2)</sup>                    |    |                                    |                                                            |
|                                   | Subphrenic                     | 1 (1.4%) <sup>2)</sup>                  |    | 0 (0.0%) <sup>2)</sup>                    |    |                                    |                                                            |
| Access to collection              | Direct                         | 28 (40.0%) <sup>2)</sup>                | 70 | 4 (30.8%) <sup>2)</sup>                   | 13 | 0.758                              |                                                            |
|                                   | Transhepatic                   | 42 (60.0%) <sup>2)</sup>                |    | 9 (69.2%) <sup>2)</sup>                   |    |                                    |                                                            |
| Visual appearance of aspirate     | Bilious                        | 21 (36.2%) <sup>2)</sup>                | 58 | 3 (23.1%) <sup>2)</sup>                   | 13 | <b>0.018</b>                       | >0.999                                                     |
|                                   | Bloody                         | 4 (6.9%) <sup>2)</sup>                  | 58 | 6 (46.2%) <sup>2)</sup>                   | 13 |                                    | <b>0.002</b>                                               |
|                                   | Chylus                         | 3 (5.2%) <sup>2)</sup>                  | 58 | 0 (0.0%) <sup>2)</sup>                    | 13 |                                    | >0.999                                                     |
|                                   | Purulent                       | 15 (25.9%) <sup>2)</sup>                | 58 | 2 (15.4%) <sup>2)</sup>                   | 13 |                                    | >0.999                                                     |
|                                   | Serous                         | 15 (25.9%) <sup>2)</sup>                | 58 | 2 (15.4%) <sup>2)</sup>                   | 13 |                                    | >0.999                                                     |

|                          |           |                                      |    |                                         |    |              |              |
|--------------------------|-----------|--------------------------------------|----|-----------------------------------------|----|--------------|--------------|
| Type of fluid collection |           |                                      |    |                                         |    |              |              |
|                          | Abscess   | 27 (43.5%)                           |    | 9 (75.0%)                               |    |              | <0.0001      |
|                          | Biloma    | 23 (37.1%)                           | 62 | 1 (8.3%)                                | 12 | <b>0.040</b> | <b>0.002</b> |
|                          | Haematoma | 4 (6.5%)                             |    | 2 (16.7%)                               |    |              | <b>0.008</b> |
|                          | Seroma    | 8 (12.9%)                            |    | 0 (0.0%)                                |    |              | 0.052        |
| Volume of aspirate       |           |                                      |    |                                         |    |              |              |
|                          | ml        | 100 [10,300]<br>(3-600) <sup>3</sup> | 13 | 20 [11.5, 510]<br>(3-1000) <sup>3</sup> | 3  | 0.946        |              |

N: number; <sup>1</sup>: only if applicable; <sup>2</sup>: Numbers (Percentage); 3: median [25%-; 75%-quartiles] (range)

p-Values in bold indicate significant differences



**Supplementary Table S7:** Factors affecting clinical success. Parameters refer to the level of the inserted drainages.

| Parameter              | Value / Unit                       | Clinical Success Group                             |    |                                                     |    | P-value (Intergroup comparison) | P-value (Pairwise post-hoc comparison) <sup>1)</sup> |
|------------------------|------------------------------------|----------------------------------------------------|----|-----------------------------------------------------|----|---------------------------------|------------------------------------------------------|
|                        |                                    | Successful                                         | n  | Unsuccessful                                        | n  |                                 |                                                      |
| Total number of drains | 1                                  | 69 (89.6%) <sup>2)</sup>                           | 77 | 15 (88.2%) <sup>2)</sup>                            | 17 | >0.999                          |                                                      |
|                        | 2                                  | 8 (10.4%) <sup>2)</sup>                            |    | 2 (11.8%) <sup>2)</sup>                             |    |                                 |                                                      |
| Access path            | Transabdominal ventral             | 19 (24.7%) <sup>2)</sup>                           | 77 | 4 (23.5%) <sup>2)</sup>                             | 17 | <b>0.031</b>                    | >0.999                                               |
|                        | Transabdominal right ventrolateral | 7 (9.1%) <sup>2)</sup>                             |    | 3 (17.6%) <sup>2)</sup>                             |    |                                 | >0.999                                               |
|                        | Transabdominal right lateral       | 18 (23.4%) <sup>2)</sup>                           |    | 0 (0.0%) <sup>2)</sup>                              |    |                                 | <b>0.042</b>                                         |
|                        | Transabdominal left lateral        | 2 (2.6%) <sup>2)</sup>                             |    | 0 (0.0%) <sup>2)</sup>                              |    |                                 | >0.999                                               |
|                        | Transabdominal right dorsolateral  | 3 (3.9%) <sup>2)</sup>                             |    | 0 (0.0%) <sup>2)</sup>                              |    |                                 | >0.999                                               |
|                        | Transabdominal right dorsal        | 0 (0.0%) <sup>2)</sup>                             |    | 2 (11.8%) <sup>2)</sup>                             |    |                                 | >0.999                                               |
|                        | Transhepatic right lateral         | 15 (19.5%) <sup>2)</sup>                           |    | 4 (23.5%) <sup>2)</sup>                             |    |                                 | >0.999                                               |
|                        | Transhepatic ventral               | 10 (13.0%) <sup>2)</sup>                           |    | 4 (23.5%) <sup>2)</sup>                             |    |                                 | >0.999                                               |
|                        | Transhepatic right ventrolateral   | 3 (3.9%) <sup>2)</sup>                             |    | 0 (0.0%) <sup>2)</sup>                              |    |                                 | >0.999                                               |
| Technique              | Direct Seldinger                   | 73 (96.1%) <sup>2)</sup><br>3 (3.9%) <sup>2)</sup> | 76 | 16 (100.0%) <sup>2)</sup><br>0 (0.0%) <sup>2)</sup> | 16 | >0.999                          |                                                      |
| Drain size             | 7.5F                               | 9 (11.7%) <sup>2)</sup>                            | 77 | 0 (0.0%) <sup>2)</sup>                              | 17 | 0.799                           |                                                      |
|                        | 8F                                 | 23 (29.9%) <sup>2)</sup>                           |    | 5 (29.4%) <sup>2)</sup>                             |    |                                 |                                                      |
|                        | 10F                                | 36 (46.8%) <sup>2)</sup>                           |    | 10 (58.8%) <sup>2)</sup>                            |    |                                 |                                                      |
|                        | 12F                                | 8 (10.4%) <sup>2)</sup>                            |    | 2 (11.8%) <sup>2)</sup>                             |    |                                 |                                                      |
|                        | 14F                                | 1 (1.3%) <sup>2)</sup>                             |    | 0 (0.0%) <sup>2)</sup>                              |    |                                 |                                                      |
| Drain duration         | Days                               | 7 [6, 19] (2-54) <sup>3)</sup>                     | 29 | 10 [10,15] (8-54) <sup>3)</sup>                     | 5  | 0.251                           |                                                      |

N: number; <sup>1)</sup> only if applicable; <sup>2)</sup> Numbers (Percentage); <sup>3)</sup> median [25%-; 75%-quartiles] (range)

p-Values in bold indicate significant differences
